# Supplementary material for: MCM-41/PVA Composite as a Separator for Zinc–Air Batteries
Source: MDPI journal article supplement (doi:10.3390/ijms21197052), 2020-09-25
Supplement: s1 [file s1]

# MCM-41/PVA Composite as a Separator for Zinc-Air Batteries

MCM – 41 was successfully synthesized. The structure of the MCM-41 was observed by using TEM and illustrated in Figure 3(a). It indicated cylindrical pores typically found in MCM-41. In addition, the XRD pattern in Figure 3 (b) indicates a narrow reflection peak at  $2.3^\circ$  and less pronounced peaks at  $4.9^\circ$  and  $4.1^\circ$  that confirms the characteristics of mesoporous MCM-41. In addition, the surface area of the MCM-41 was measured using  $N_2$  adsorption/desorption isotherm and was calculated to be  $1651 \text{ m}^2/\text{g}$  with a mean pore diameter of  $2.38 \text{ nm}$ .

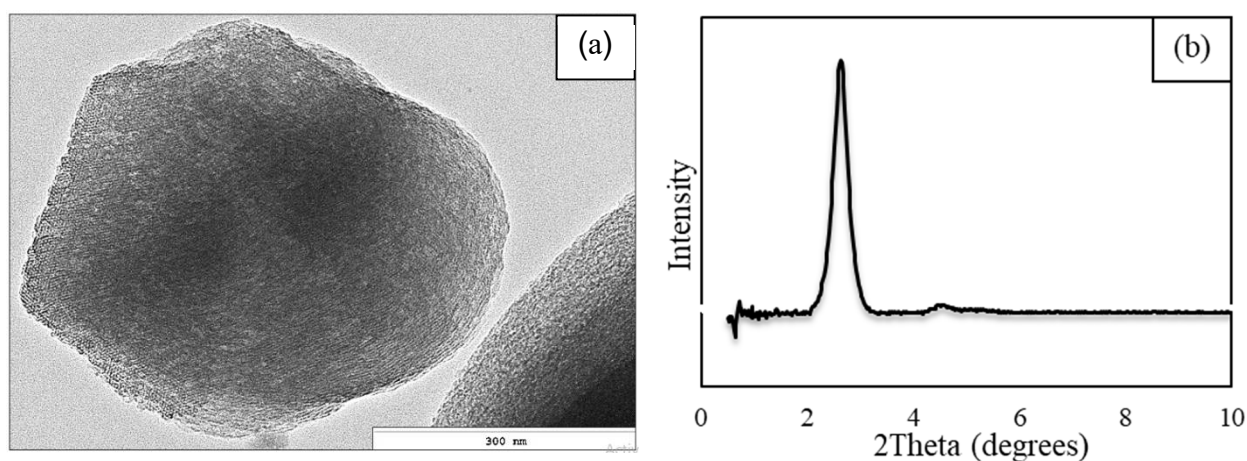

**Figure S1.** (a) TEM image and (b) XRD patterns of the synthesized MCM-41.
